# Supplementary material for: DFT and POM Analyses of New Synthesized Armed Pyrimidine-5- Carboxylates as Antitumor Cytostatic Agents
Source: Research Square preprint supplement (doi:10.21203/rs.3.rs-7388536/v1), 2025-10-23
Supplement: Supplementary file 1 [file 9ab81232cc1b8b530b3e1935.docx]

Spectra


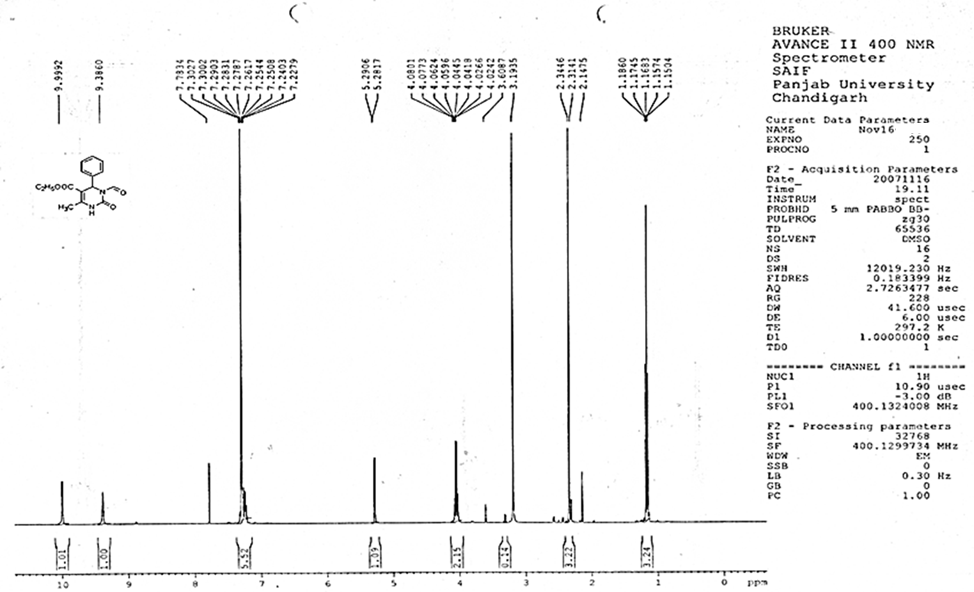


**1H NMR Spectra of 2a**


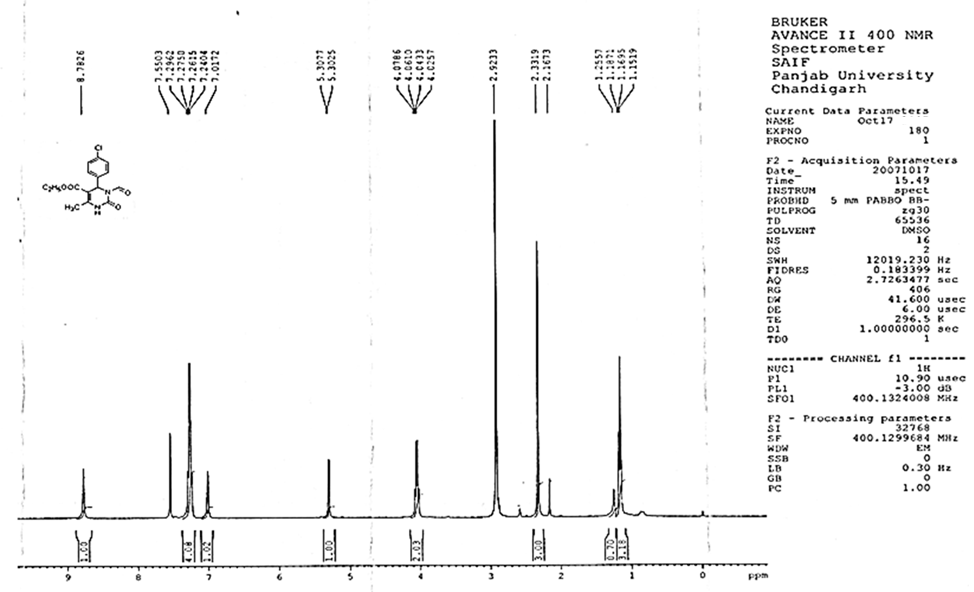


**1H NMR Spectra of 2b**


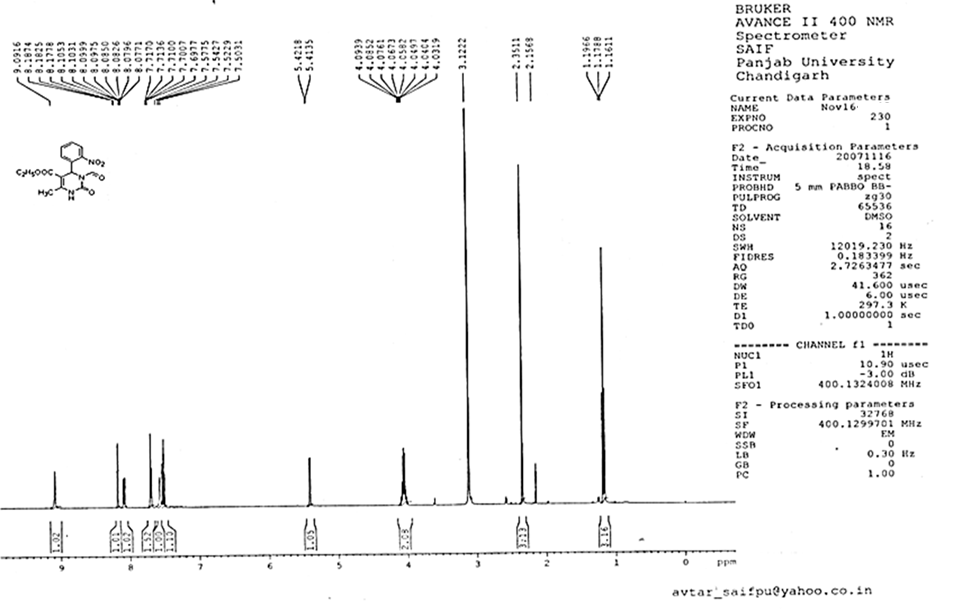


Spectra

**1H NMR Spectra of 2c**


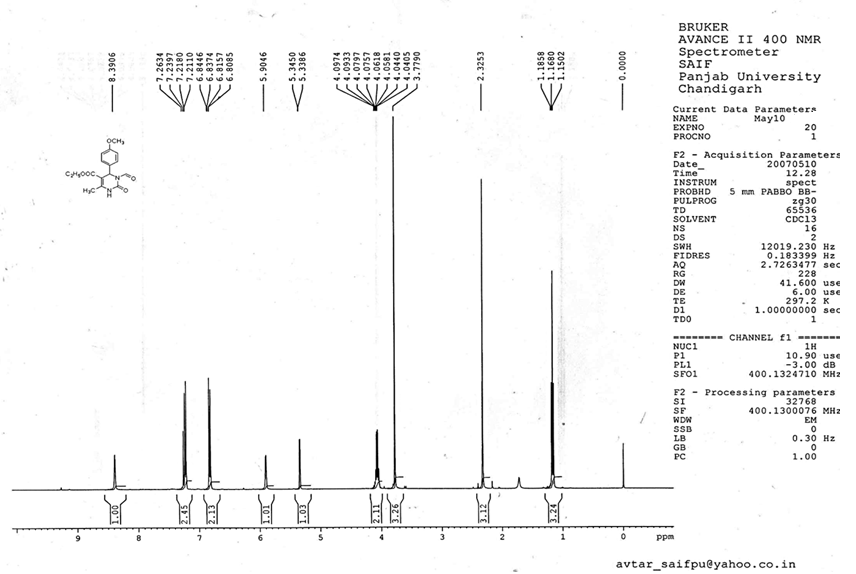


**1H NMR Spectra of 2d**


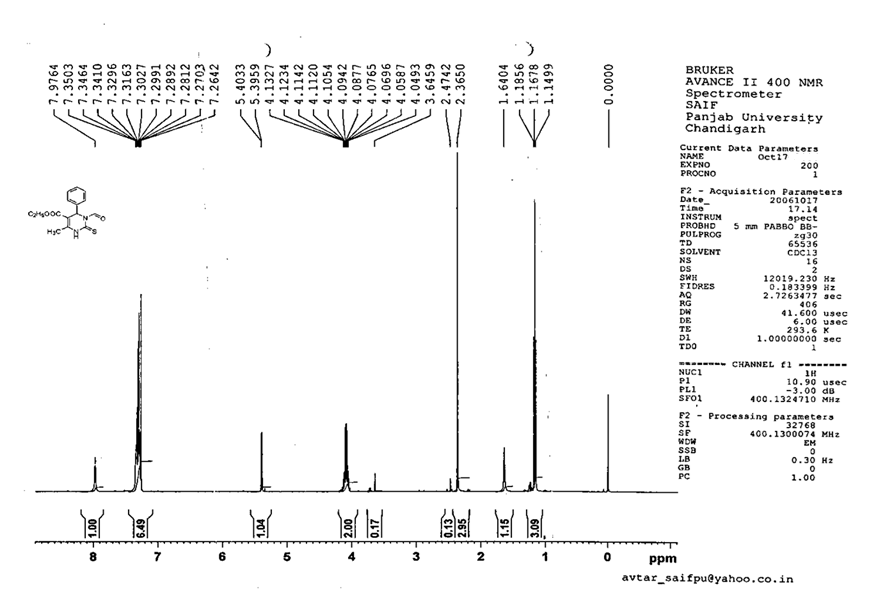


**1H NMR Spectra of 2e**


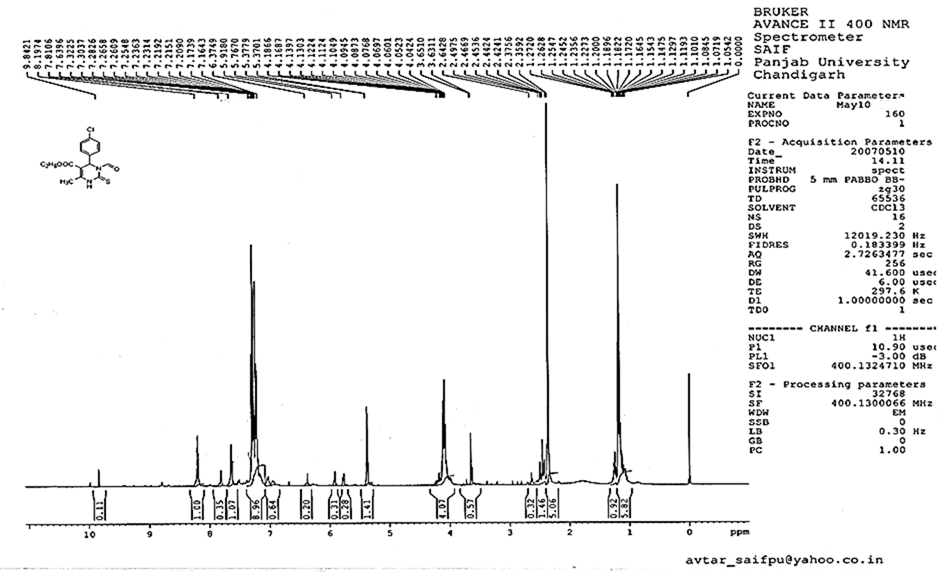


**1H NMR Spectra of 2f**

**
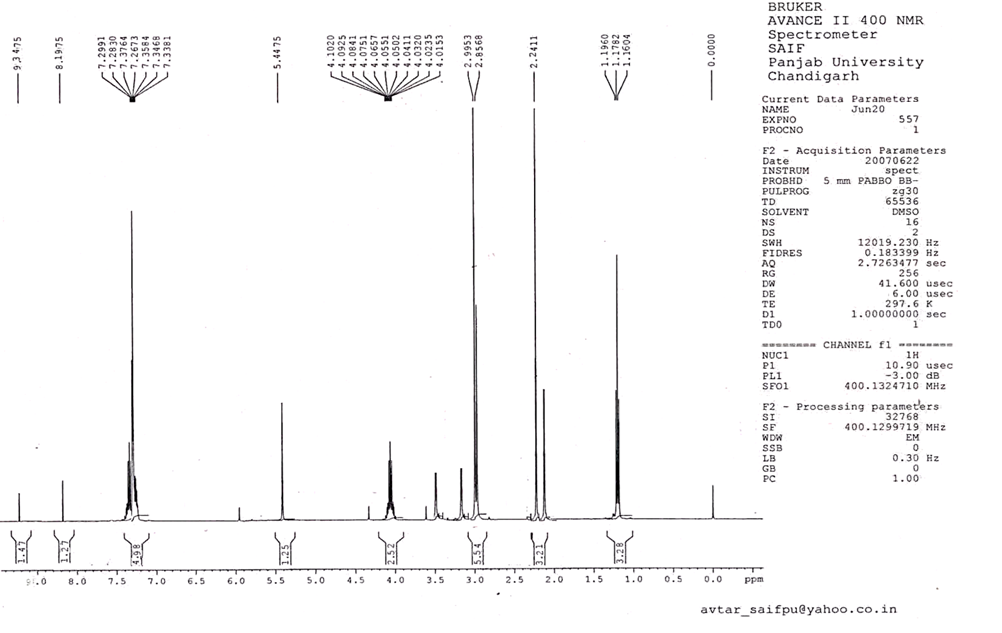
**

**1H NMR Spectra of 2g**


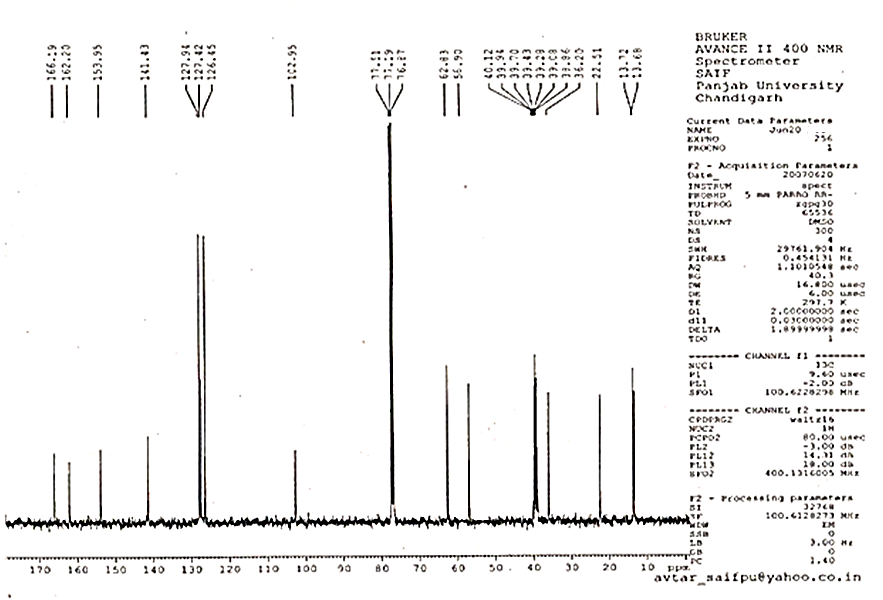


**13CNMR of 2a**


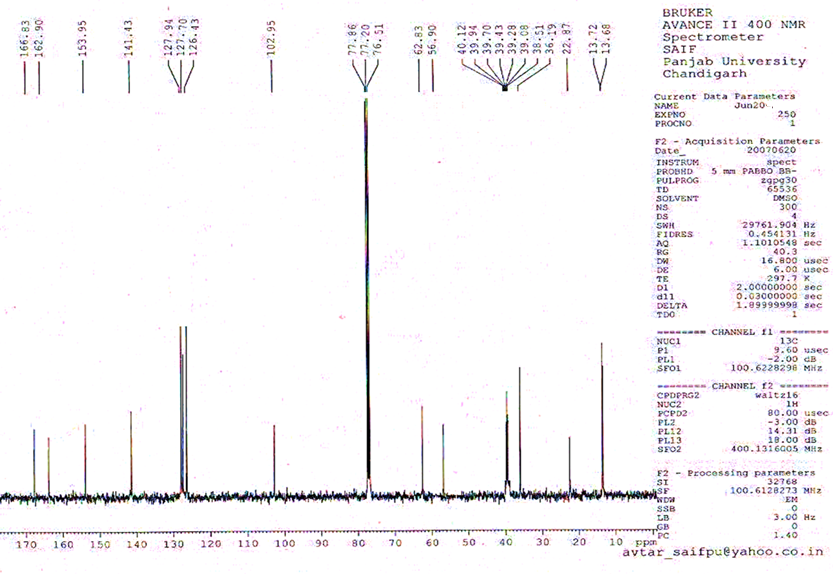


**13CNMR of 2b**


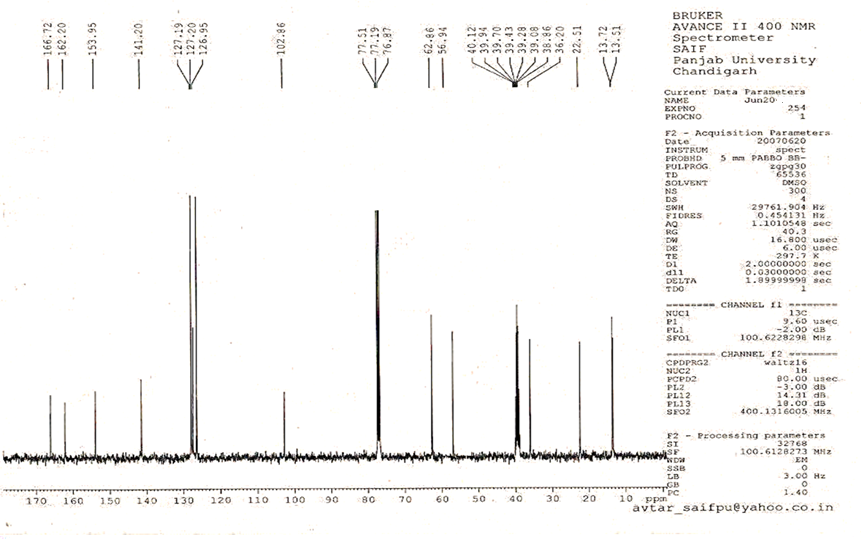


**13CNMR of 2c**


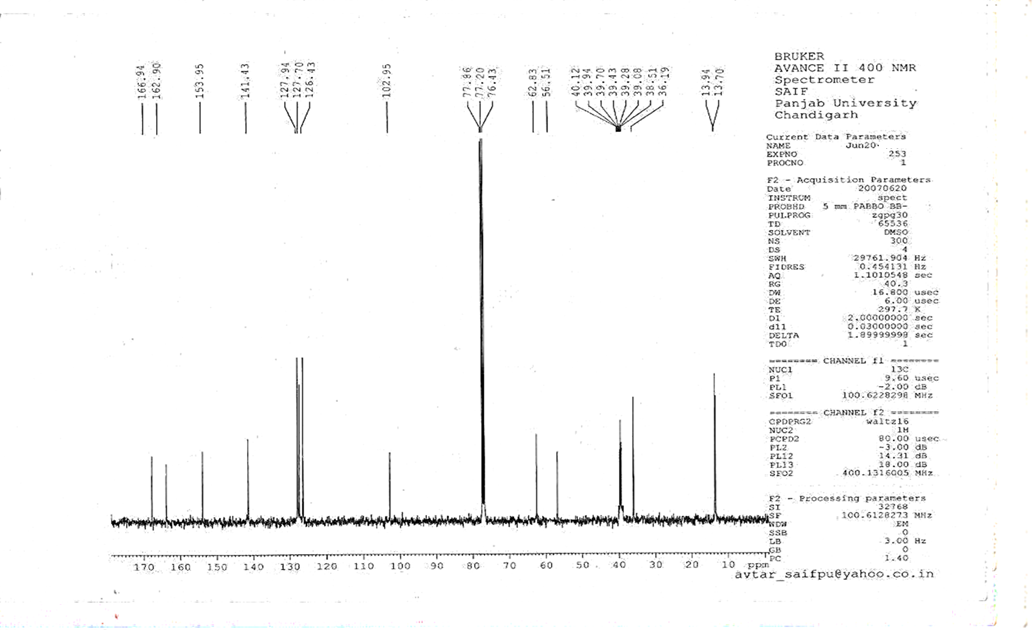


**13CNMR of 2d**


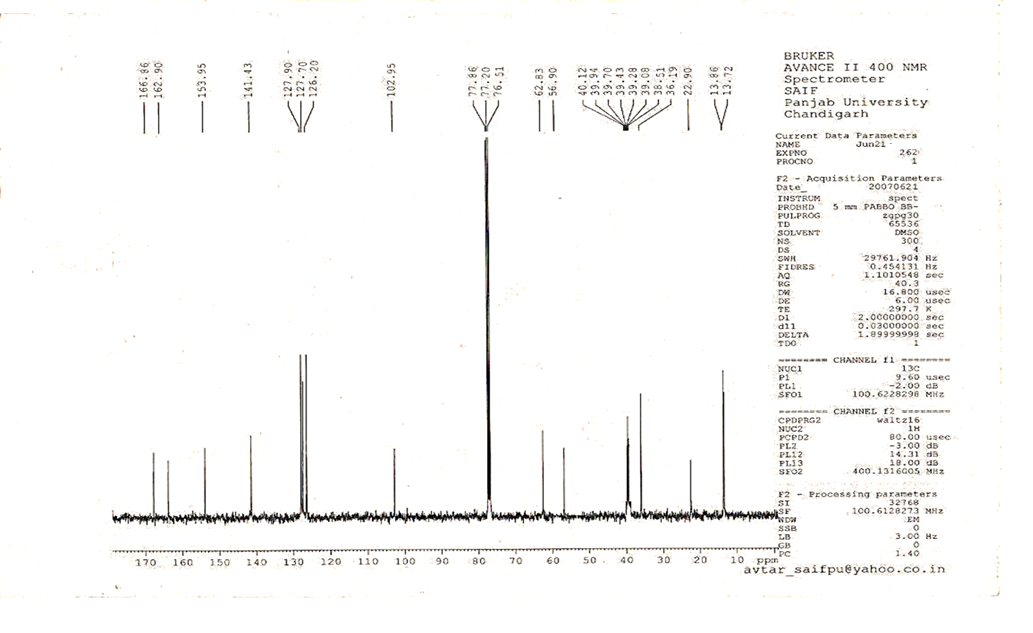


**13CNMR of 2e**

**
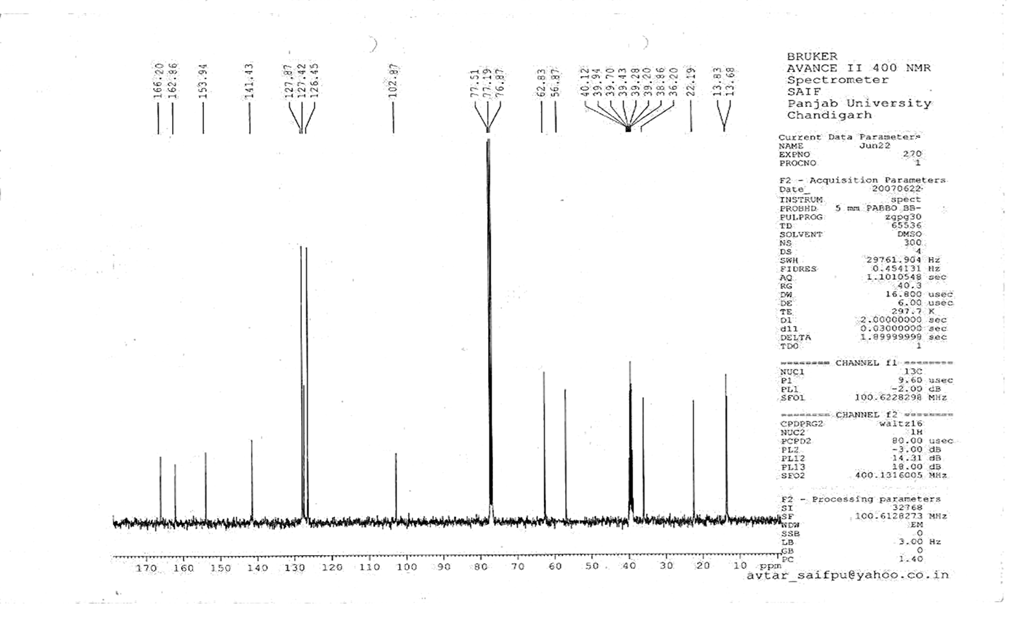
**

**13CNMR of 2f**


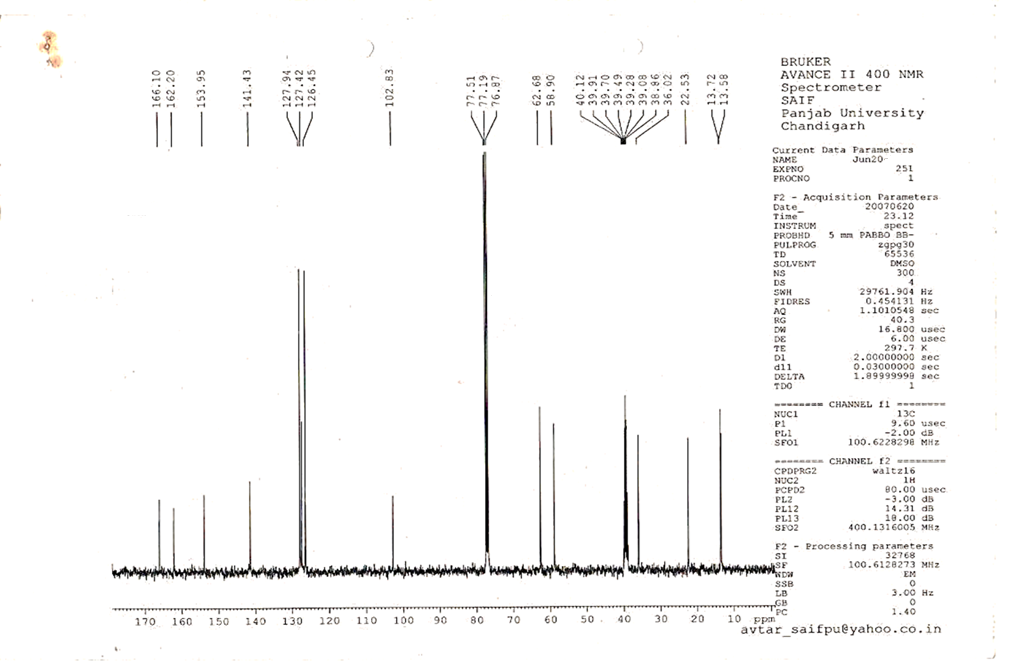


**13CNMR of 2g**


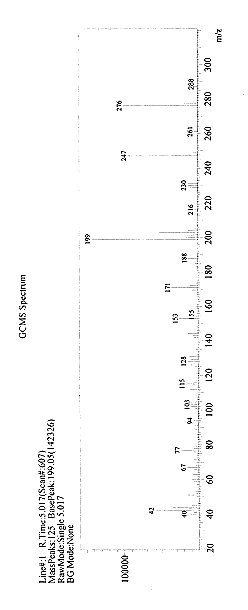


**MASS spectra of 2a**


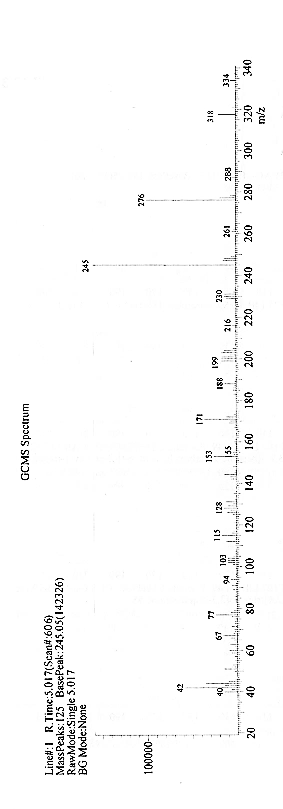


**MASS spectra of 2b**


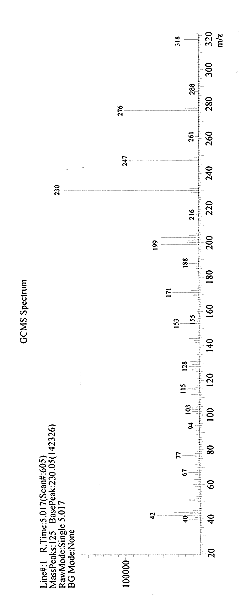


**MASS spectra of 2c**


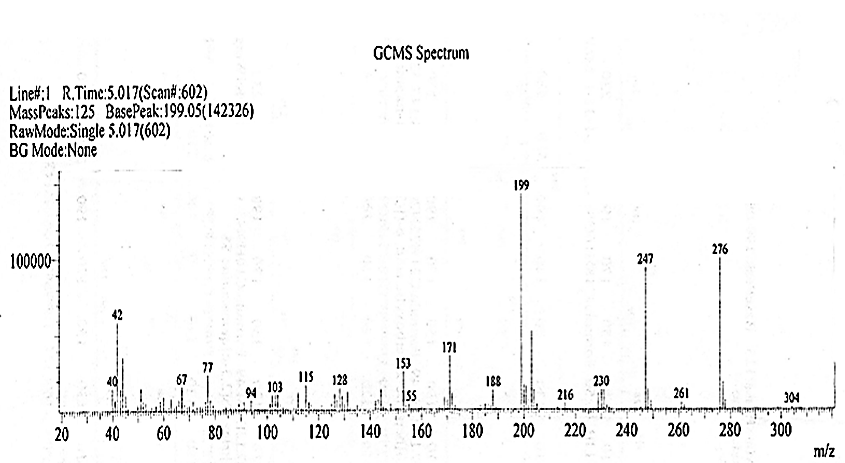


**MASS spectra of 2d**


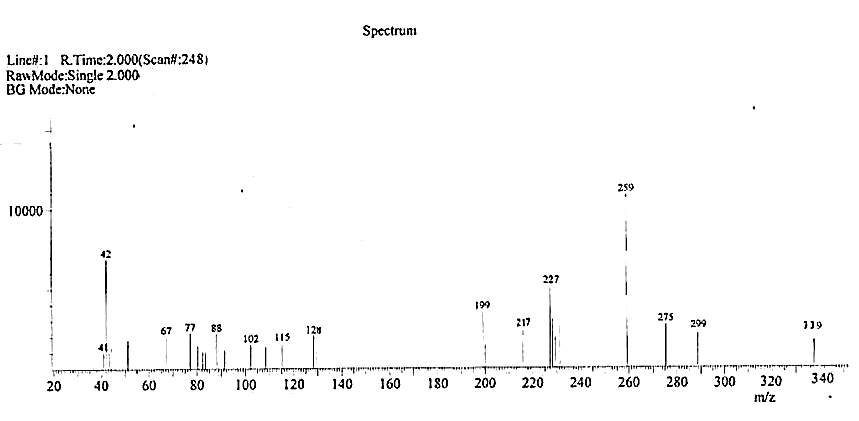


**MASS spectra of 2e**


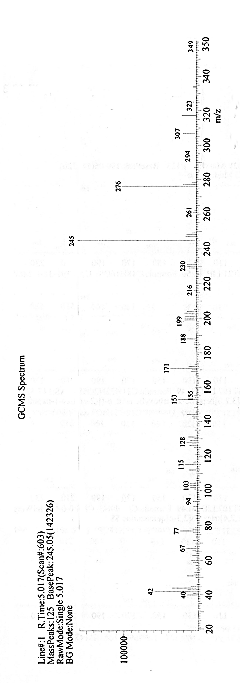


**MASS spectra of 2f**
